# Supplementary material for: MicroRNA-149* suppresses hepatic inflammatory response through antagonizing STAT3 signaling pathway
Source: PubMed Central journal article supplement (PMC5630339; doi:10.18632/oncotarget.18541), 2017-06-16
Supplement: oncotarget-08-65397-s001.pdf [file oncotarget-08-65397-s001.pdf]

## MicroRNA-149\* suppresses hepatic inflammatory response through antagonizing STAT3 signaling pathway

### SUPPLEMENTARY MATERIALS

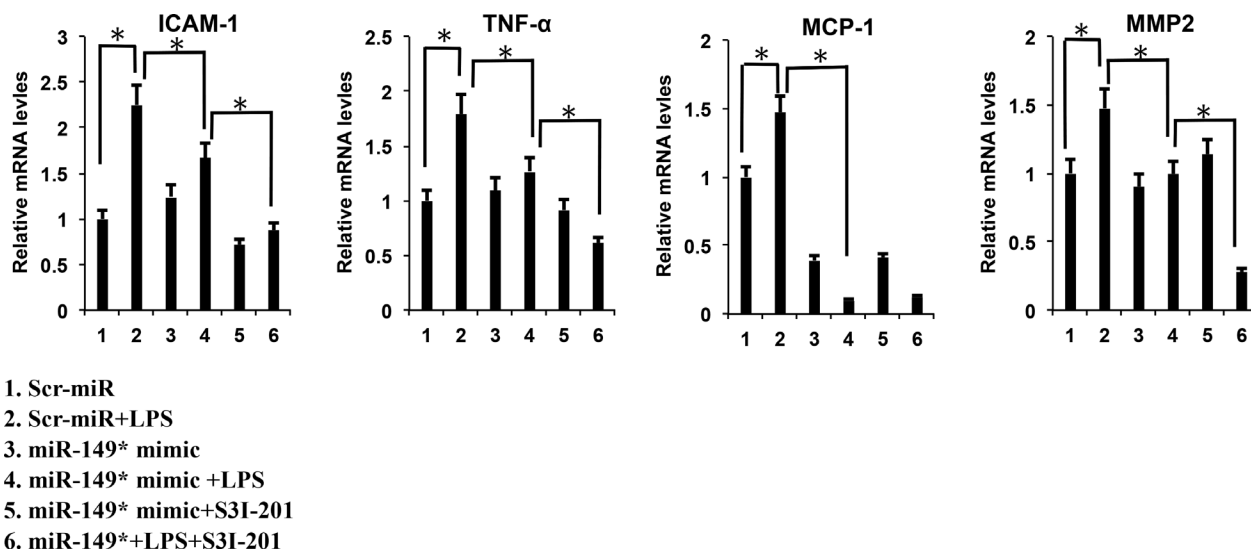

**Supplementary Figure 1: STAT3 inhibitor S3I-201 enhanced the suppression effect of miR-149\* on proinflammatory gene expression induced by LPS.** HepG2 cells were transfected with miR-149\* mimics or control mimics (Scr-miR). After 24 hours, cells were treated with S3I-201 (100  $\mu$ M) for 24 hours. Then cells were treated with LPS (40  $\mu$ g/mL) for 6 hours and collected for qRT-PCR analysis. \* $P < 0.05$ . ( $n = 3$ ).

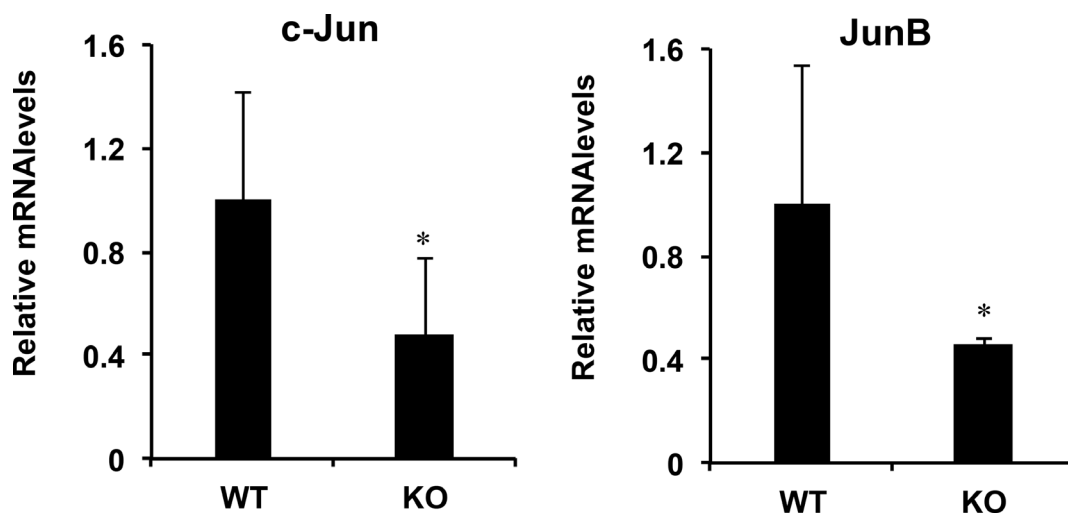

**Supplementary Figure 2: The gene expression of c-Jun and JunB in Jun signaling.** Quantitative real-time PCR analysis of the expression of c-Jun and JunB in livers from 8-week-old wild-type (WT) or miR-149<sup>-/-</sup> (KO) mice ( $n = 5$ ). \* $P < 0.05$  versus the WT group.
